# Supplementary material for: Global warming has increased global economic inequality
Source: PubMed Central journal article supplement — Proc Natl Acad Sci U S A. 2019 Apr 22;116(20):9808–13. doi: 10.1073/pnas.1816020116 (PMC6525504; doi:10.1073/pnas.1816020116), 2019-04-22
Supplement: pnas.1816020116.sapp.pdf [file pnas.1816020116.sapp.pdf]

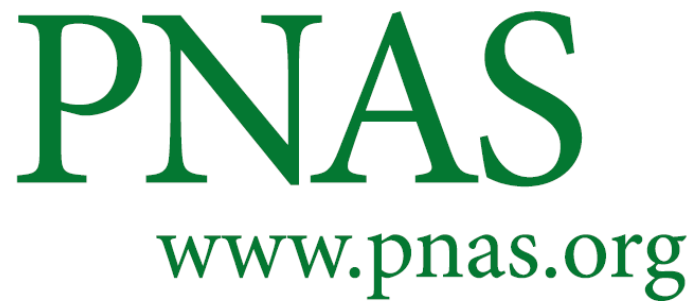

## Supplementary Information for

Global warming has increased global economic inequality

Noah S. Diffenbaugh\* and Marshall Burke

\*corresponding author: Noah S. Diffenbaugh  
Email: [difflenbaugh@stanford.edu](mailto:difflenbaugh@stanford.edu)

### **This PDF file includes:**

Figs. S1 to S4  
Tables S1 to S2  
References for SI reference citations

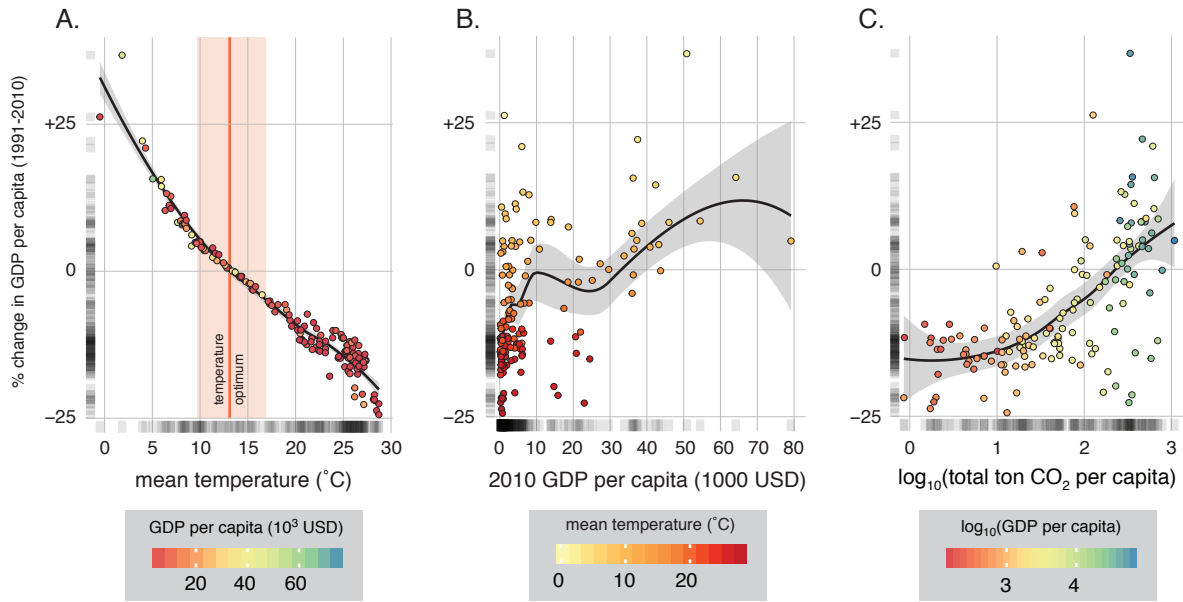

Figure S1. As in Figure 3, but for percent change in GDP per capita calculated for the 1991-2010 period.

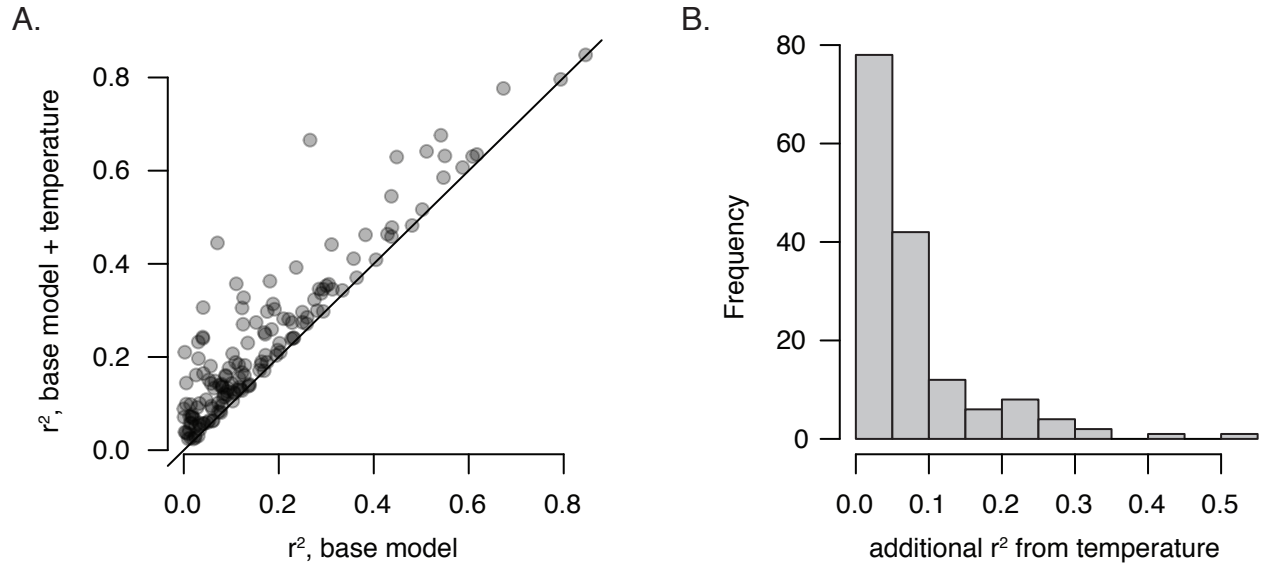

Figure S2. Temperature explains meaningful variation in income growth at the country level. A: Explanatory power of a model with only time trends (x-axis), versus a model that also includes temperature (y-axis). Each point represents values from a country-level time series regression ( $n=154$  countries with at least 20 years of data). B: Histogram of additional variance explained by temperature across countries (mean=8.6% additional variance explained in growth).

Impact of 1961-2010 annual temperature fluctuations on 2010 GDP per capita

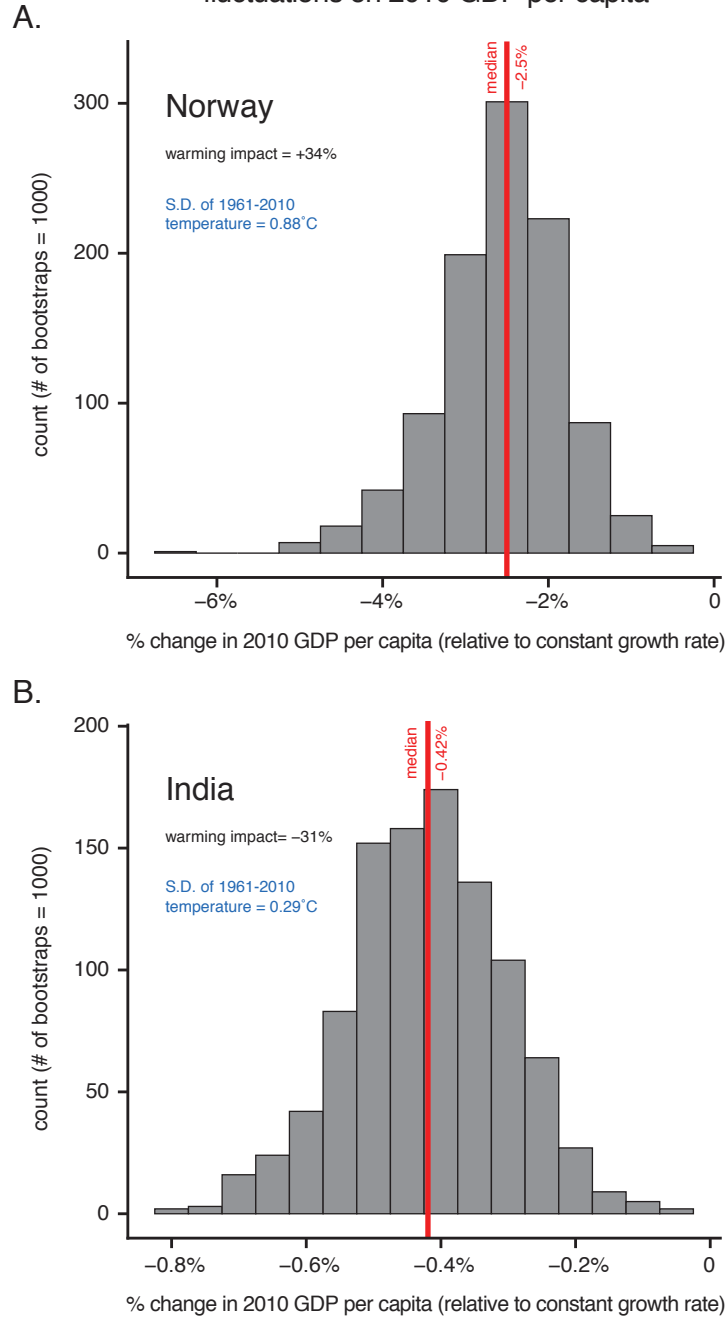

Figure S3. Impact of 1961-2010 annual temperature fluctuations on 2010 GDP per capita. A: The distribution (across the 1000 bootstraps) of percent change in 2010 GDP per capita of Norway caused by Norway's inter-annual temperature fluctuations from 1961-2010, relative to a constant mean-annual growth rate. B: As in A, but for India. The magnitude of the fluctuation effect is small compared to the impact of long term warming. Further, because the temperature variability is generally larger in the higher latitudes than the lower latitudes (e.g., (1)), we can infer that if the negative trends in GDP per capita induced by temperature fluctuations have influenced the overall impact of global warming on country-level inequality, it will have been to slightly dampen the impact of warming (because the fluctuation-induced muting of gains in cool countries will be generally larger than the fluctuation-induced enhancement of losses in warm countries).

Population-weighted empirical CDF of GDP per capita in 2010  
for countries with continuous GDP data from 1961–2010

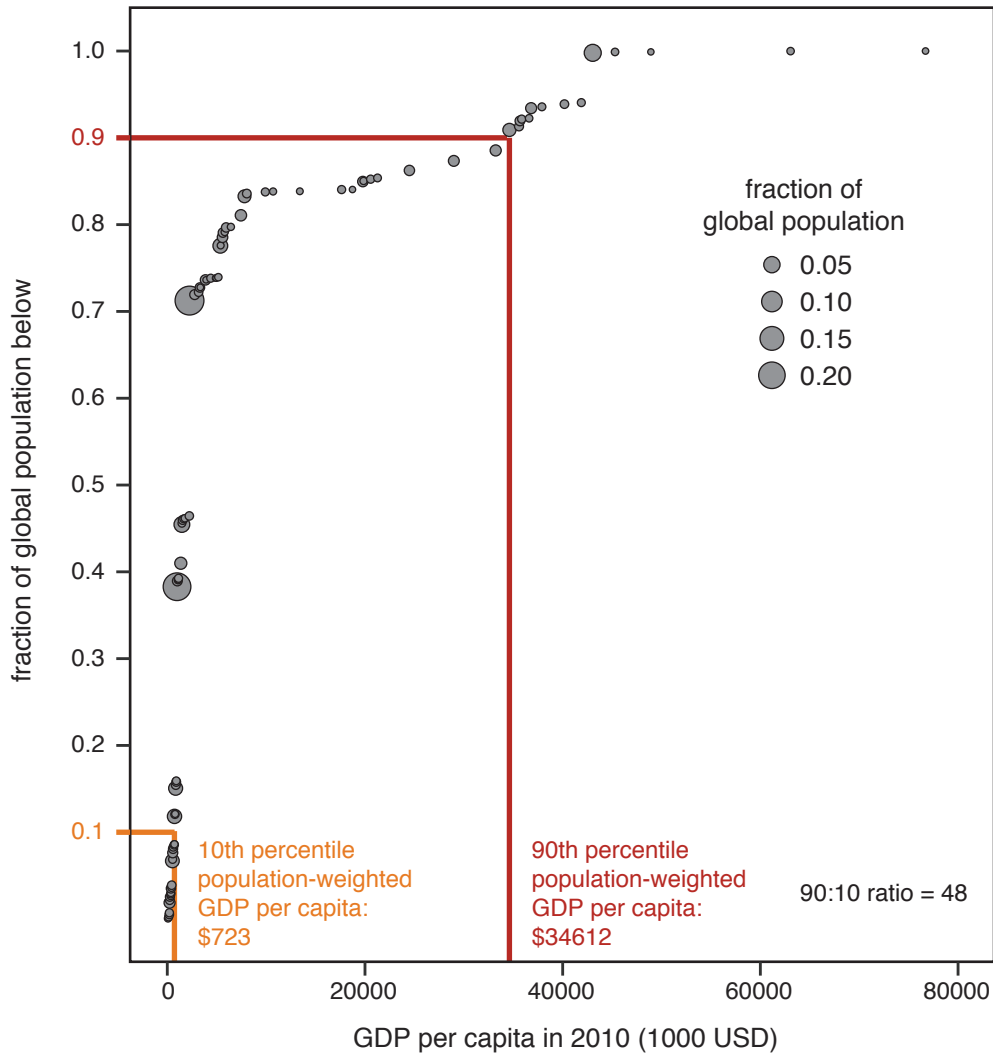

Figure S4. Calculation of the ratio between the top and bottom deciles of the population-weighted per capita GDP distribution. Because of the lack of availability of long timeseries of sub-national economic data, global country-level inequality is calculated as the ratio between the top and bottom deciles using the 10th percentile and 90th percentile of the population-weighted empirical CDF of country-level per capita GDP values. The 10th percentile population-weighted per capita GDP and the 90th percentile population-weighted per capita GDP are calculated as the country-level per capita GDP for which the total population of countries with a lower per capita GDP are 10% and 90% of the total population of countries in the 1961-2010 dataset, respectively. The between-country population-weighted economic inequality is then calculated as the ratio between the 90th percentile and 10th percentile population-weighted per capita GDP (“90:10 ratio”).

Table S1. National-level response of per capita GDP to anthropogenic climate forcing shown in Figure 2.

| country ISO | % change in GDP per capita (median) |           | probability of economic damage |           |
|-------------|-------------------------------------|-----------|--------------------------------|-----------|
|             | 1961-2010                           | 1991-2010 | 1961-2010                      | 1991-2010 |
| AGO         | –                                   | -12.9%    | –                              | 0.998     |
| ALB         | –                                   | -0.1%     | –                              | 0.490     |
| ARE         | –                                   | -22.7%    | –                              | 0.999     |
| ARM         | –                                   | 9.5%      | –                              | 0.101     |
| AUS         | -7.0%                               | -4.0%     | 0.913                          | 0.904     |
| AUT         | 16.0%                               | 7.9%      | 0.197                          | 0.099     |
| AZE         | –                                   | 0.6%      | –                              | 0.444     |
| BDI         | -23.4%                              | -11.6%    | 0.995                          | 0.995     |
| BEL         | 7.2%                                | 3.5%      | 0.219                          | 0.111     |
| BEN         | -27.9%                              | -15.2%    | 0.904                          | 0.904     |
| BFA         | -37.4%                              | -21.8%    | 1.000                          | 1.000     |
| BGD         | -22.8%                              | -12.0%    | 0.809                          | 0.904     |
| BGR         | –                                   | 4.0%      | –                              | 0.208     |
| BHS         | -23.7%                              | -14.2%    | 0.999                          | 0.999     |
| BLR         | –                                   | 11.2%     | –                              | 0.144     |
| BLZ         | -25.8%                              | -15.2%    | 0.999                          | 0.999     |
| BOL         | -11.1%                              | -5.6%     | 0.955                          | 0.947     |
| BRA         | -24.5%                              | -13.5%    | 0.998                          | 0.998     |
| BRN         | –                                   | -15.2%    | –                              | 0.999     |
| BTN         | –                                   | 0.5%      | –                              | 0.398     |
| BWA         | -22.9%                              | -12.5%    | 0.949                          | 0.949     |
| CAF         | -24.6%                              | -13.6%    | 0.999                          | 0.999     |
| CAN         | 32.0%                               | 15.6%     | 0.049                          | 0.049     |
| CHE         | –                                   | 8.3%      | –                              | 0.050     |
| CHL         | 10.4%                               | 5.0%      | 0.042                          | 0.046     |
| CHN         | -1.4%                               | -0.9%     | 0.580                          | 0.618     |
| CIV         | -32.0%                              | -17.5%    | 0.999                          | 0.999     |
| CMR         | -27.0%                              | -14.8%    | 0.998                          | 0.998     |
| COD         | -32.2%                              | -17.9%    | 0.998                          | 0.998     |
| COG         | -30.3%                              | -16.3%    | 0.998                          | 0.999     |
| COL         | -23.5%                              | -11.8%    | 0.995                          | 0.995     |
| COM         | –                                   | -13.7%    | –                              | 0.999     |
| CPV         | –                                   | -7.3%     | –                              | 0.997     |
| CRI         | -21.0%                              | -10.9%    | 0.998                          | 0.998     |
| CUB         | –                                   | -12.6%    | –                              | 0.999     |
| CYP         | –                                   | -6.6%     | –                              | 0.896     |
| CZE         | –                                   | 8.6%      | –                              | 0.146     |

|     |        |        |       |       |
|-----|--------|--------|-------|-------|
| DEU | –      | 6.2%   | –     | 0.108 |
| DJI | –      | -21.0% | –     | 1.000 |
| DNK | 15.5%  | 8.1%   | 0.193 | 0.100 |
| DOM | -24.0% | -12.6% | 0.999 | 0.999 |
| DZA | -9.3%  | -5.1%  | 0.897 | 0.910 |
| ECU | -16.7% | -8.3%  | 0.992 | 0.992 |
| EGY | –      | -11.4% | –     | 0.997 |
| ESP | -2.9%  | -1.8%  | 0.702 | 0.703 |
| ETH | –      | -9.4%  | –     | 0.993 |
| FIN | 48.2%  | 22.1%  | 0.095 | 0.048 |
| FJI | -17.6% | -10.1% | 0.998 | 0.998 |
| FRA | 4.8%   | 2.4%   | 0.207 | 0.169 |
| GAB | -25.0% | -13.5% | 0.999 | 0.999 |
| GBR | 9.5%   | 5.0%   | 0.121 | 0.034 |
| GEO | –      | 4.0%   | –     | 0.246 |
| GHA | -28.2% | -15.6% | 0.999 | 0.999 |
| GIN | –      | -17.0% | –     | 0.999 |
| GMB | –      | -15.6% | –     | 0.999 |
| GNB | –      | -14.5% | –     | 0.999 |
| GNQ | –      | -10.8% | –     | 0.998 |
| GRC | -3.5%  | -2.1%  | 0.623 | 0.671 |
| GTM | -20.5% | -12.3% | 0.998 | 0.998 |
| GUY | -31.5% | -16.3% | 0.999 | 0.999 |
| HND | -26.0% | -14.8% | 0.998 | 0.998 |
| HUN | 5.4%   | 3.5%   | 0.317 | 0.230 |
| IDN | -27.3% | -14.7% | 0.999 | 0.999 |
| IND | -31.0% | -16.2% | 0.951 | 0.951 |
| IRL | –      | 4.3%   | –     | 0.016 |
| IRN | –      | -3.1%  | –     | 0.823 |
| ISL | 92.3%  | 36.7%  | 0.095 | 0.000 |
| ISR | -16.7% | -10.6% | 0.900 | 0.995 |
| ITA | 1.0%   | 0.0%   | 0.475 | 0.480 |
| JOR | –      | -6.9%  | –     | 0.972 |
| JPN | -1.1%  | -0.9%  | 0.552 | 0.572 |
| KAZ | –      | 10.3%  | –     | 0.001 |
| KEN | -18.6% | -10.0% | 0.994 | 0.994 |
| KGZ | –      | 10.7%  | –     | 0.049 |
| KOR | 2.9%   | 1.8%   | 0.356 | 0.305 |
| LAO | –      | -11.3% | –     | 0.856 |
| LBN | –      | -1.0%  | –     | 0.600 |
| LBR | -27.8% | -14.0% | 0.999 | 0.999 |
| LKA | -26.3% | -14.0% | 0.999 | 0.999 |
| LSO | 6.5%   | 3.0%   | 0.169 | 0.164 |

|     |        |        |       |       |
|-----|--------|--------|-------|-------|
| LTU | –      | 12.7%  | –     | 0.143 |
| LUX | 10.1%  | 4.9%   | 0.117 | 0.071 |
| LVA | –      | 13.2%  | –     | 0.144 |
| MAR | –      | -5.1%  | –     | 0.943 |
| MDA | –      | 4.9%   | –     | 0.207 |
| MDG | -18.4% | -9.4%  | 0.996 | 0.997 |
| MEX | -10.0% | -5.7%  | 0.987 | 0.987 |
| MKD | –      | 5.0%   | –     | 0.252 |
| MLI | –      | -23.7% | –     | 1.000 |
| MNG | –      | 26.2%  | –     | 0.190 |
| MOZ | –      | -14.5% | –     | 0.998 |
| MRT | -41.1% | -24.4% | 1.000 | 1.000 |
| MUS | –      | -10.1% | –     | 0.998 |
| MWI | -25.6% | -13.6% | 0.998 | 0.998 |
| MYS | -26.0% | -14.4% | 0.999 | 0.999 |
| NAM | –      | -13.3% | –     | 0.997 |
| NER | -40.1% | -22.6% | 1.000 | 1.000 |
| NGA | -29.2% | -16.5% | 0.904 | 0.904 |
| NIC | -29.9% | -16.6% | 0.999 | 0.999 |
| NLD | 7.9%   | 3.9%   | 0.194 | 0.104 |
| NOR | 34.3%  | 15.7%  | 0.144 | 0.049 |
| NPL | -23.5% | -12.1% | 0.902 | 0.949 |
| NZL | –      | 1.0%   | –     | 0.344 |
| OMN | -30.7% | -19.9% | 0.951 | 0.951 |
| PAK | -23.9% | -11.9% | 0.856 | 0.903 |
| PAN | -27.4% | -14.7% | 0.999 | 0.999 |
| PER | -6.4%  | -3.2%  | 0.814 | 0.820 |
| PHL | -24.8% | -12.9% | 0.999 | 0.999 |
| PNG | -17.5% | -8.7%  | 0.998 | 0.998 |
| POL | –      | 8.1%   | –     | 0.148 |
| PRI | -20.8% | -11.4% | 0.998 | 0.999 |
| PRT | -4.0%  | -2.1%  | 0.736 | 0.768 |
| PRY | -18.9% | -9.7%  | 0.998 | 0.951 |
| ROU | –      | 4.7%   | –     | 0.206 |
| RUS | –      | 20.9%  | –     | 0.096 |
| RWA | -21.0% | -11.7% | 0.994 | 0.995 |
| SAU | –      | -21.4% | –     | 0.999 |
| SDN | -36.0% | -22.0% | 1.000 | 1.000 |
| SEN | -29.9% | -16.3% | 0.999 | 0.999 |
| SLB | –      | -14.1% | –     | 0.999 |
| SLE | -29.2% | -16.2% | 0.999 | 0.999 |
| SLV | –      | -13.2% | –     | 0.998 |
| SRB | –      | 4.0%   | –     | 0.260 |



|     |        |        |       |       |
|-----|--------|--------|-------|-------|
| SUR | –      | -20.9% | –     | 0.999 |
| SVK | –      | 8.0%   | –     | 0.194 |
| SVN | –      | 7.3%   | –     | 0.149 |
| SWE | 24.8%  | 14.4%  | 0.096 | 0.096 |
| SWZ | –      | -8.4%  | –     | 0.994 |
| TCD | -38.7% | -21.9% | 1.000 | 1.000 |
| TGO | -26.1% | -14.8% | 0.904 | 0.904 |
| THA | –      | -15.5% | –     | 0.999 |
| TJK | –      | 2.8%   | –     | 0.231 |
| TKM | –      | -2.6%  | –     | 0.862 |
| TTO | -21.3% | -12.1% | 0.999 | 0.999 |
| TUN | –      | -7.4%  | –     | 0.945 |
| TUR | 2.8%   | 1.4%   | 0.362 | 0.352 |
| TZA | –      | -11.9% | –     | 0.998 |
| UGA | –      | -12.5% | –     | 0.903 |
| UKR | –      | 8.7%   | –     | 0.195 |
| URY | -10.7% | -5.7%  | 0.932 | 0.934 |
| USA | -0.2%  | -0.2%  | 0.510 | 0.518 |
| UZB | –      | -0.9%  | –     | 0.650 |
| VCT | -24.4% | -12.6% | 0.999 | 0.999 |
| VEN | -31.8% | -17.4% | 0.999 | 0.999 |
| VNM | –      | -11.3% | –     | 0.951 |
| VUT | –      | -11.3% | –     | 0.999 |
| WSM | –      | -11.7% | –     | 0.999 |
| YEM | –      | -13.9% | –     | 0.998 |
| ZAF | -11.0% | -5.8%  | 0.961 | 0.959 |
| ZMB | -22.6% | -12.0% | 0.997 | 0.997 |
| ZWE | -18.4% | -10.0% | 0.995 | 0.995 |

Table S2. Percent change in population-weighted 90:10 percentile per capita GDP ratio from anthropogenic forcing.

|                                                              | Lag = 0 years | Lag = 1 year | Lag = 5 years |
|--------------------------------------------------------------|---------------|--------------|---------------|
| Median % change in 90:10 per capita GDP ratio                | +25%          | +11%         | +7%           |
| Probability that change in 90:10 per capita GDP ratio is > 0 | 0.89          | 0.79         | 0.66          |

## References

1. Diffenbaugh NS, Charland A (2016) Probability of emergence of novel temperature regimes at different levels of cumulative carbon emissions. *Front Ecol Environ* 14:418–423.
